# Supplementary figures and images for: Identification of synthetic inhibitors for the DNA binding of intrinsically disordered circadian clock transcription factors
Source: Royal Society of Chemistry journal article supplement (doi:10.1039/d0cc04861e), 2020-01-01

## Compound 1 exhibits cytotoxicity against Hela cells at 100 $\mu\text{M}$ .

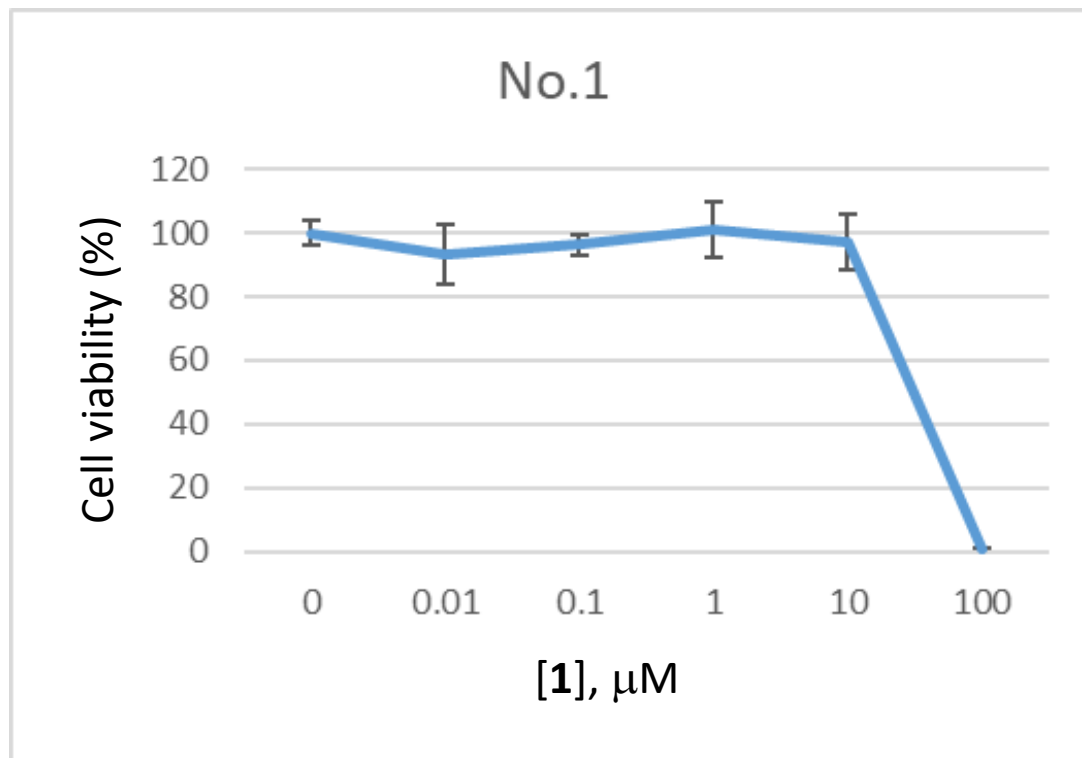

Supplement: d0cc04861e1.pdf [file d0cc04861e1.pdf]
